# Supplementary material for: Molecular basis for SNX-BAR-mediated assembly of distinct endosomal sorting tubules
Source: PubMed Central journal article supplement — EMBO J. 2012 Oct 19;31(23):4466–80. doi: 10.1038/emboj.2012.283 (PMC3512392; doi:10.1038/emboj.2012.283), 2012-10-19

### Source data figure 3

Boxed area indicates the cropped image shown in the figure.

#### Source data figure 3A

SNX4: Anti-FLAG

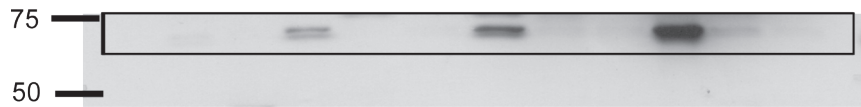

SNX4: Anti-FLAG

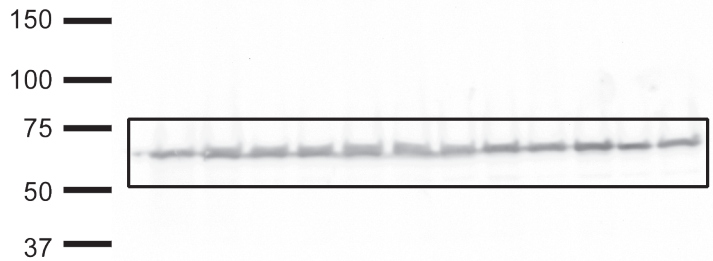

SNX4: Anti-GST

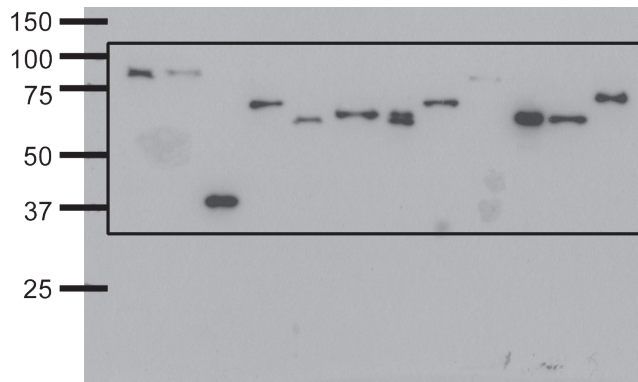

SNX7: Anti-FLAG

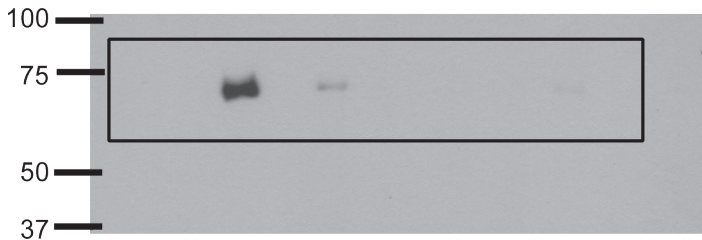

SNX30: Anti-FLAG

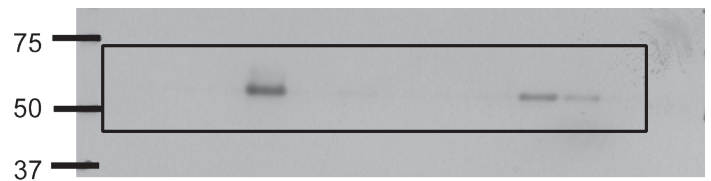

SNX7: Anti-FLAG

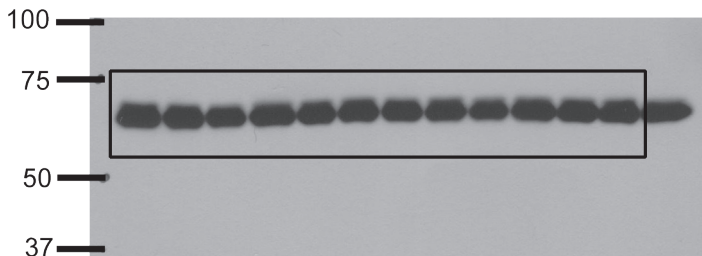

SNX30: Anti-FLAG

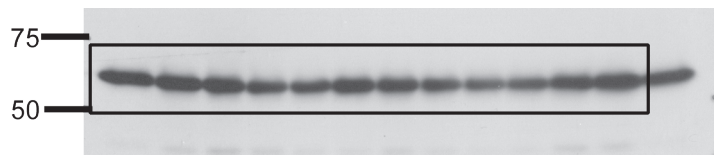

SNX7: Anti-GST

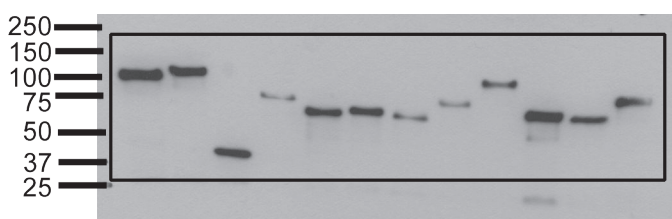

SNX30: Anti-GST

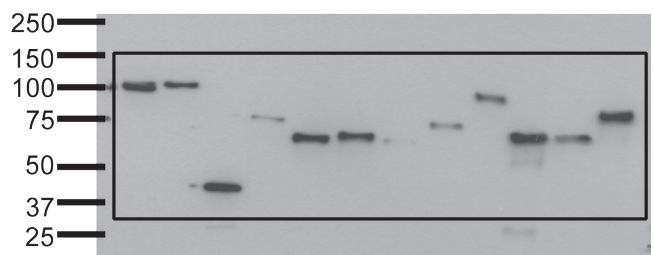

### Source data figure 3 continued

Boxed area indicates the cropped image shown in the figure.

GFP and FLAG/RFP are labelled on the same membrane using 700 nm and 800 nm fluorescent secondary antibodies, protein ladder is only visible in the 700 nm channel (lower of each pair).

### Source data figure 3B

SNX8: anti-FLAG

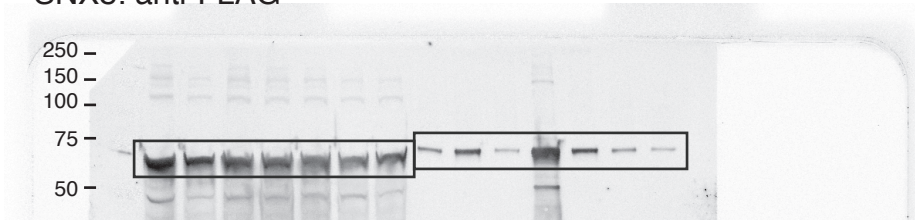

SNX8: anti-GFP

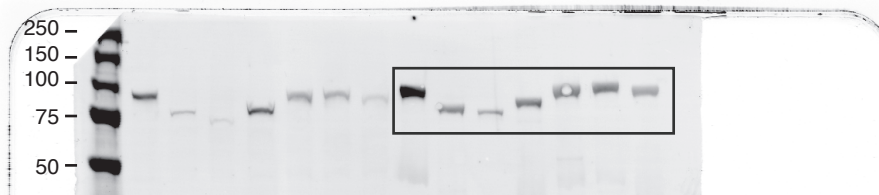

### Source data figure 3C

SNX9: anti-FLAG

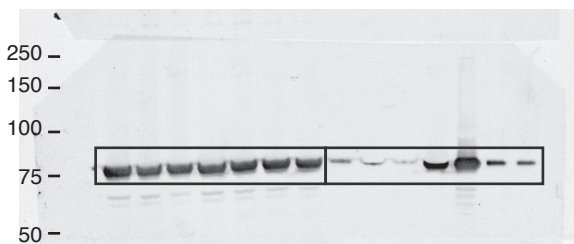

SNX18: anti-GFP

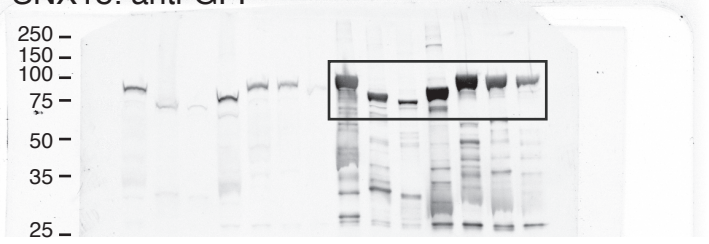

SNX9: anti-GFP

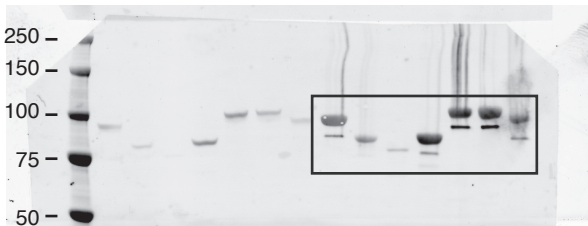

SNX18: anti-RFP

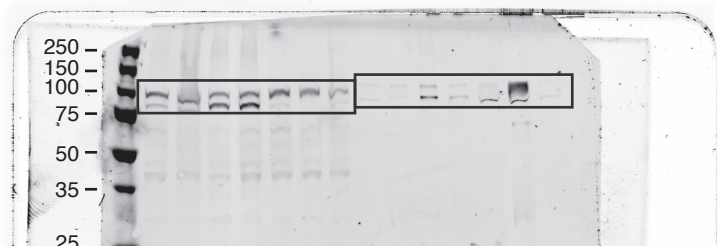

SNX33: anti-FLAG

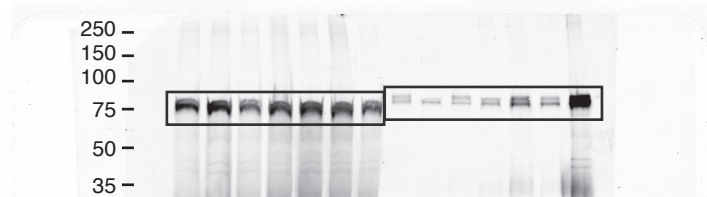

SNX33: anti-GFP

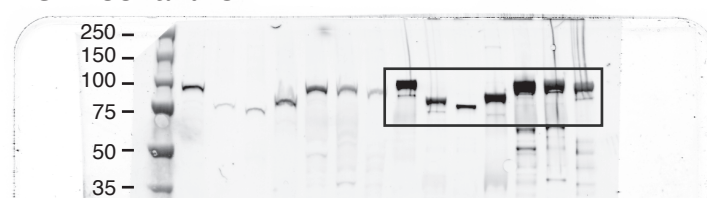

Supplement: emboj2012283s2.pdf [file emboj2012283s2.pdf]
