# Supplementary material for: Molecular basis for SNX-BAR-mediated assembly of distinct endosomal sorting tubules
Source: PubMed Central journal article supplement — EMBO J. 2012 Oct 19;31(23):4466–80. doi: 10.1038/emboj.2012.283 (PMC3512392; doi:10.1038/emboj.2012.283), 2012-10-19
Supplement: emboj2012283s1.pdf [file emboj2012283s1.pdf]

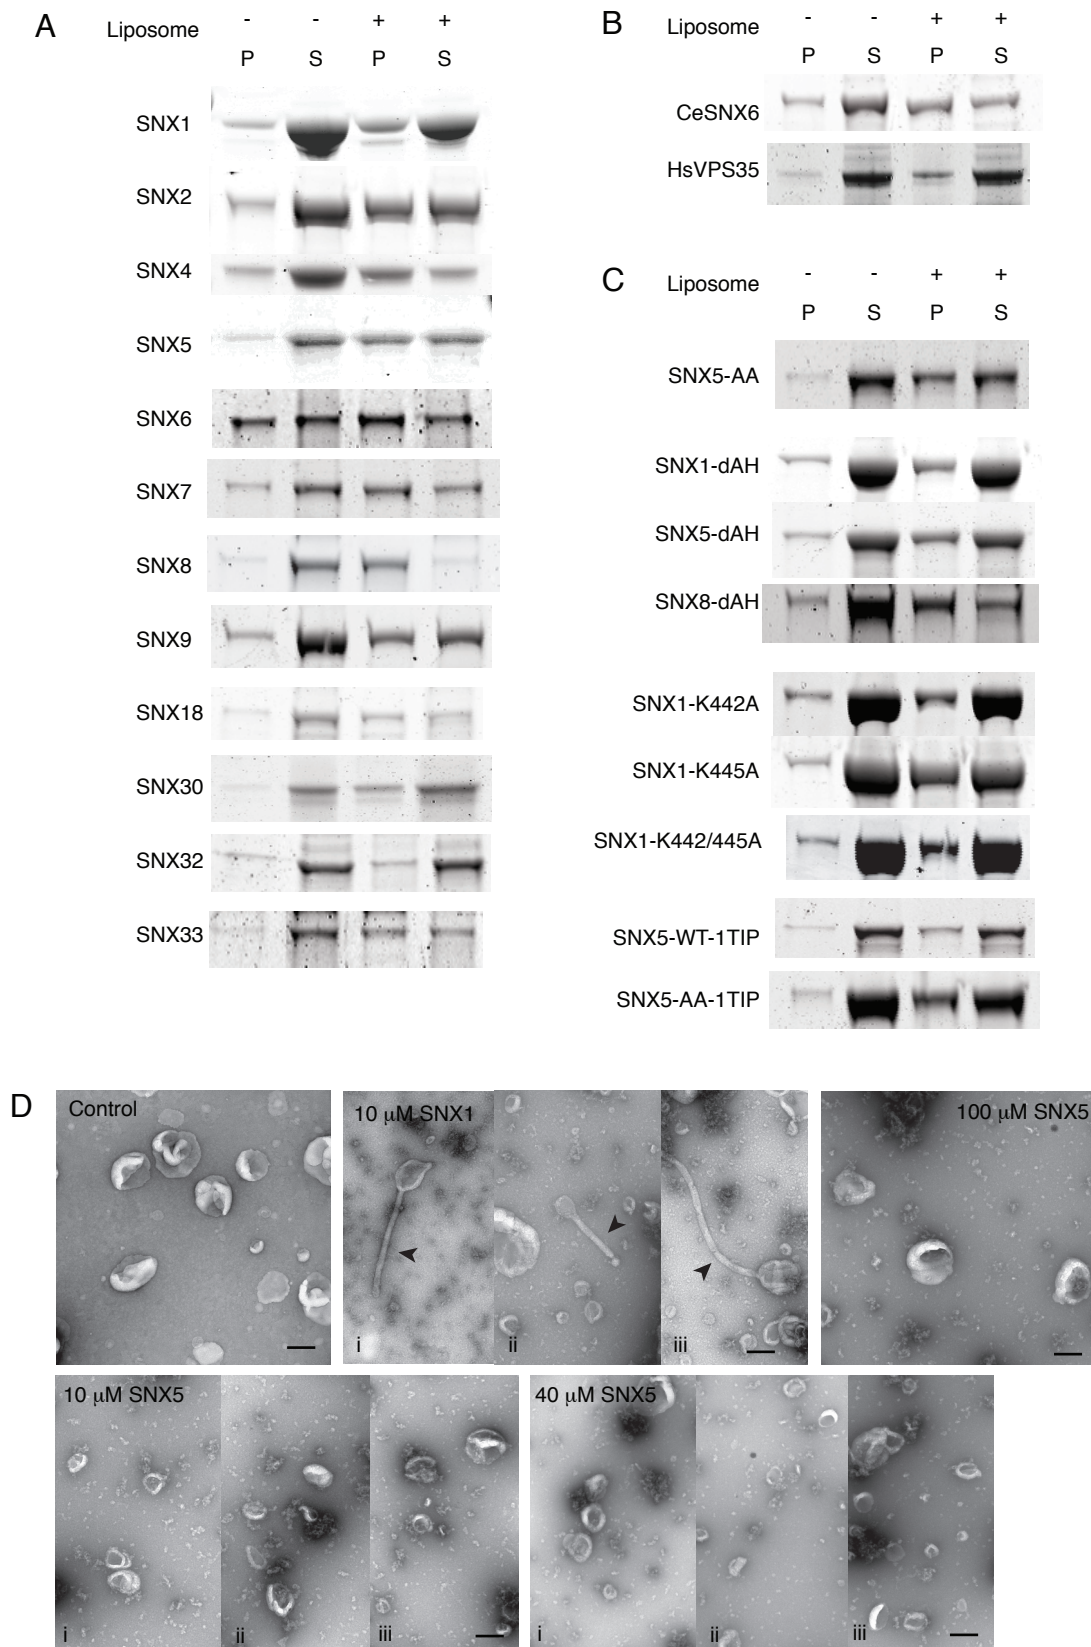

*Supplementary Figure 1. All SNX-BAR proteins are associated with liposomes.*

Coomassie-gel analysis of (A) all full-length mammalian SNX-BAR proteins, (B) *Caenorhabditis elegans* SNX6 (CeSNX6) and *Homo sapiens* VPS35 (HsVPS35), and (C) all mutant SNX-BAR proteins used in this study in the pellet (P) and supernatant (S) fractions after sedimentation in the presence or absence of liposomes.

(D) Example micrographs of liposomes incubated with control buffer, 10  $\mu$ M SNX1-WT, 10  $\mu$ M SNX5-WT, 40  $\mu$ M SNX5-WT or 100  $\mu$ M SNX5-WT final concentration for each protein (i-iii show three different example views), scale bar represents 200 nm, tubules are indicated by arrowheads.

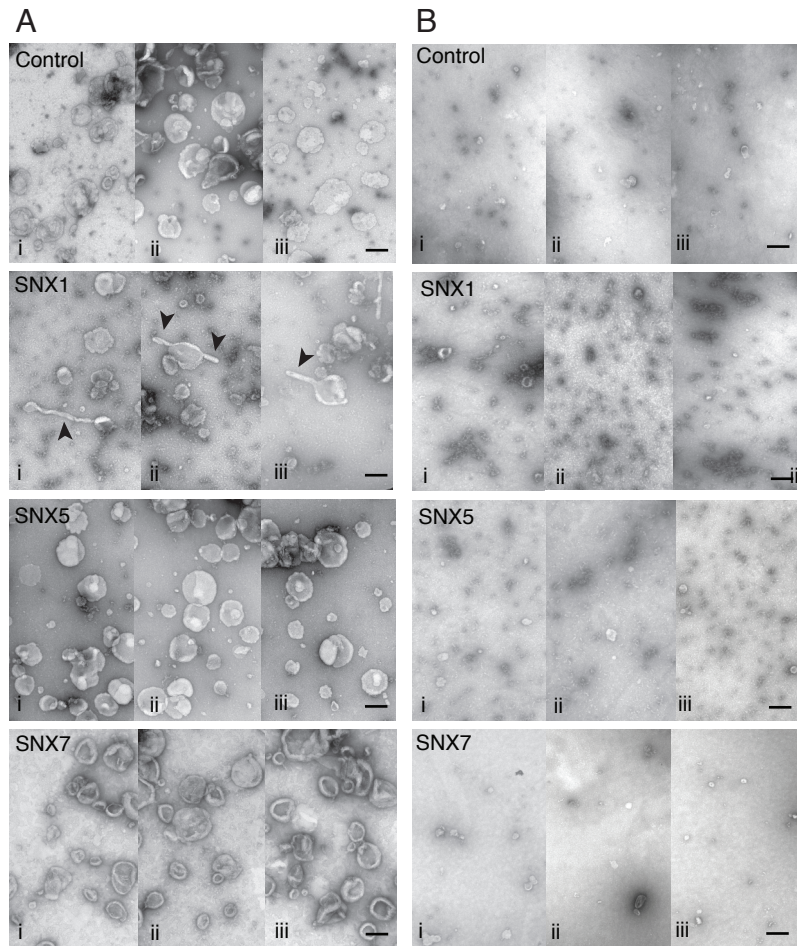

*Supplementary Figure 2: Liposomes incubated with SNX5 or SNX7 do not contain more small vesicle production compared to SNX1 or buffer control.*  
 Example micrographs of liposomes incubated with control buffer, SNX1-WT, SNX5-WT or SNX7-WT (A) before sedimentation and (B) the supernatant after 15 minute spin at 250,000 x g (i-iii show three different example views). Scale bar represents 200 nm. Tubules are indicated by arrowheads.

**A**

|       | Full length | SH3  | PX      | AH      | BAR     | NCBI         |
|-------|-------------|------|---------|---------|---------|--------------|
| SNX1  | 522         |      | 147-255 | 281-298 | 284-517 | NP_003090    |
| SNX2  | 519         |      | 143-265 | 278-295 | 281-514 | NP_003091    |
| SNX4  | 450         |      | 59-184  | 194-211 | 209-440 | NP_003785    |
| SNX5  | 404         |      | 32-169  | 183-200 | 179-393 | NP_689413    |
| SNX6  | 418         |      | 45-182  | 194-211 | 203-416 | NP_689419    |
| SNX7  | 473         |      | 120-233 | 246-263 | 217-459 | NP_057060.2  |
| SNX8  | 465         |      | 78-178  | 180-197 | 200-444 | NP_037453    |
| SNX9  | 595         | 4-59 | 251-357 | 201-214 | 386-595 | NP_057308    |
| SNX18 | 628         | 4-58 | 276-403 | 225-238 | 415-621 | NP_001096045 |
| SNX30 | 437         |      | 91-206  | 216-233 | 207-429 | NP_001013012 |
| SNX32 | 403         |      | 27-163  | 176-193 | 185-403 | Q86XE0       |
| SNX33 | 574         | 4-58 | 240-334 | 179-192 | 373-554 | ABV26009     |

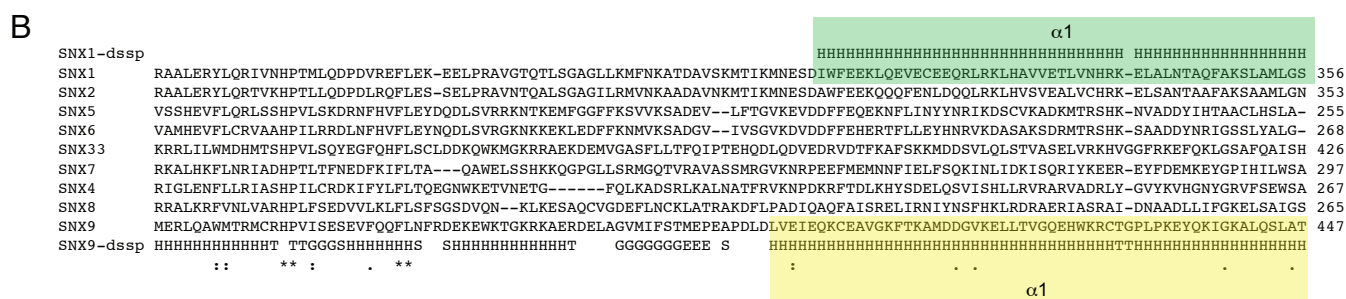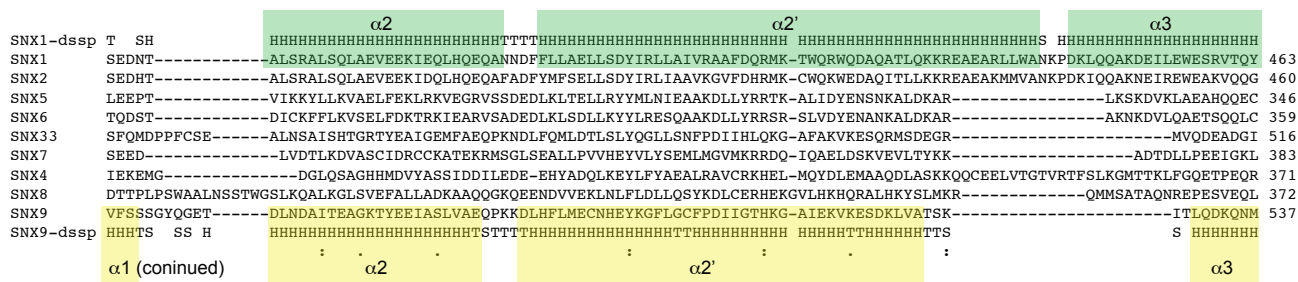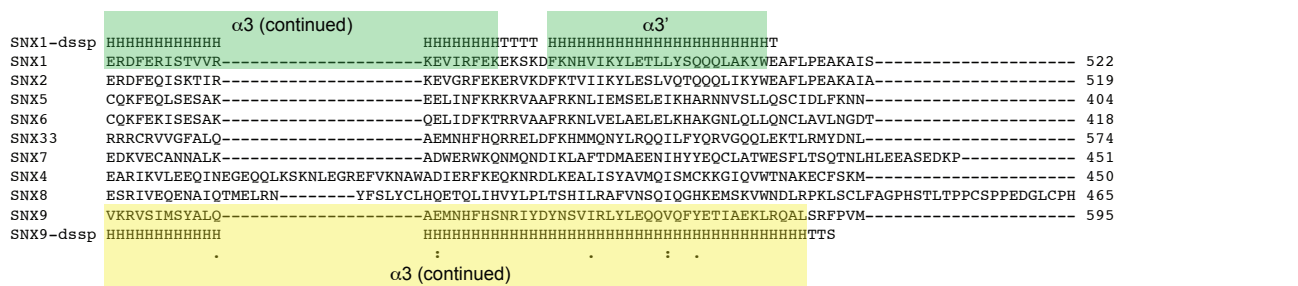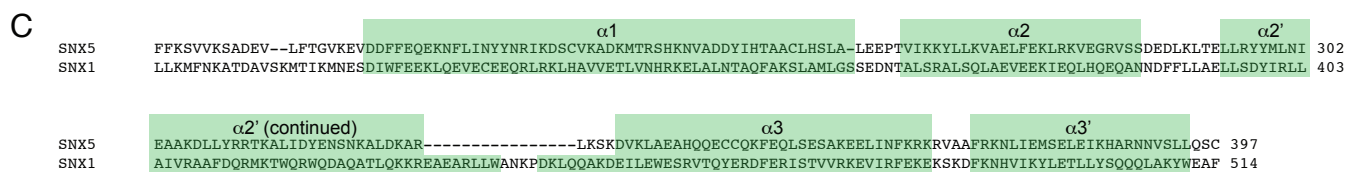

**Supplementary Figure 3: Sequence alignments used to construct the homology model of SNX5 based on SNX1.**  
 (A) Overview of the domain structure of the *Homo Sapiens* SNX-BAR proteins. Numbers indicate amino acids in the sequence.

(B) Multi-alignment of SNX1, SNX2, SNX4, SNX5, SNX6, SNX7, SNX8, SNX9 and SNX33. SNX1-dssp and SNX9-dssp indicate the secondary structure per residue (H =  $\alpha$ -helix, E =  $\beta$ -sheet, G = 3-helix S = bend, T = hydrogen bonded turn), based on SNX1 crystal structure in this study and the SNX9 structure published elsewhere (Pylypenko et al., 2007).  $\alpha$ -Helices of the BAR domain are indicated for SNX1 (green) and SNX9 (yellow).

(C) The sequence alignment used for the homology model of SNX5 based on the SNX1 structure. This alignment was extracted from the multi-alignment in (B).

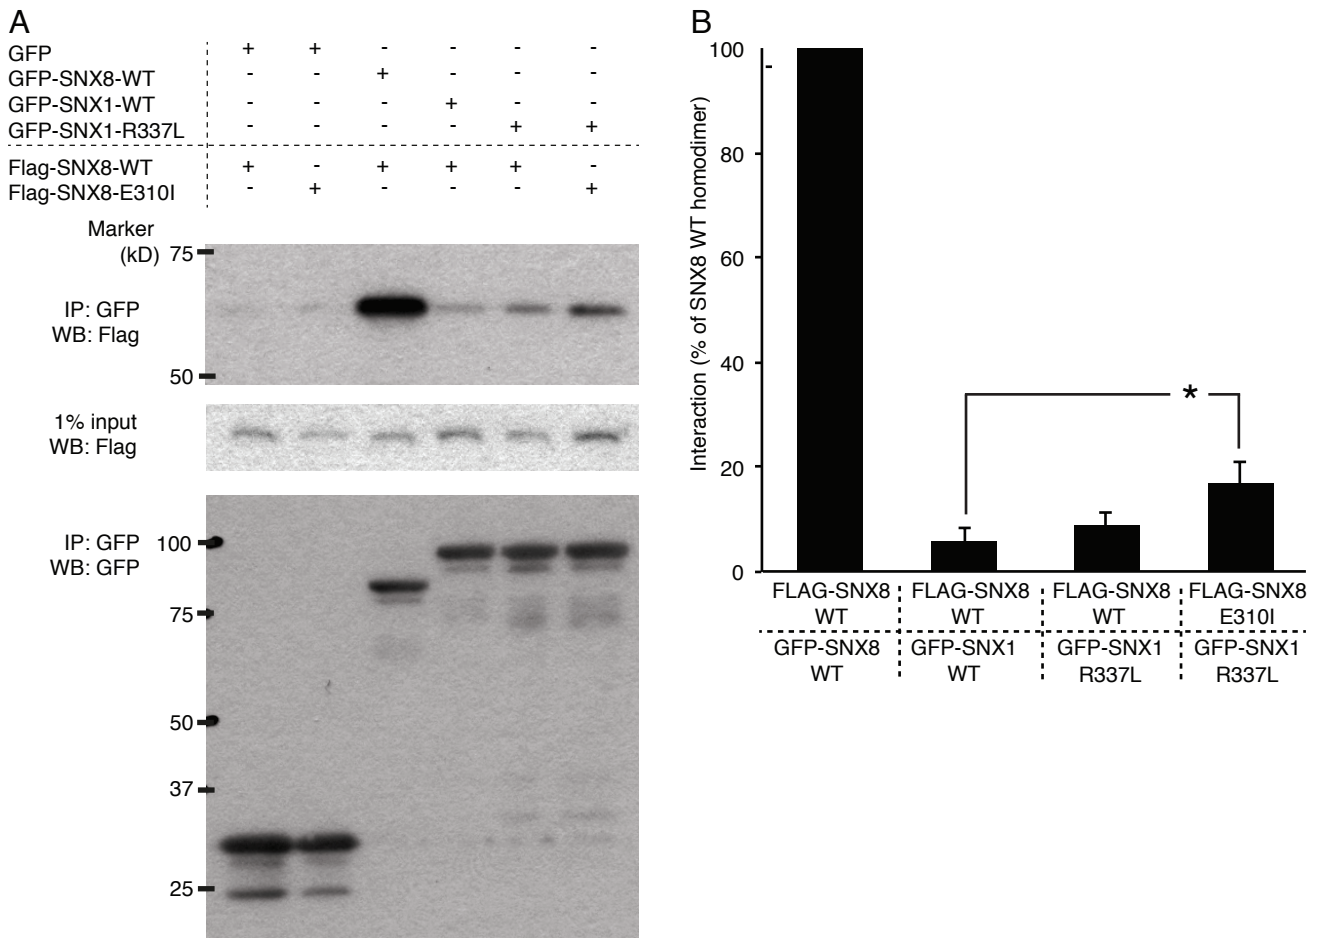

*Supplementary Figure 4: Removal of charged residues in the BAR interface of SNX1 and SNX8 allows dimerization of these two proteins.*

(A) Immunoblots of expressed Flag-SNX8-WT or Flag-SNX8-E310I co-expressing GFP control, GFP-SNX8-WT, GFP-SNX1-WT or GFP-SNX1-R337L precipitated using GFP nanotrap.

(B) Quantitative analysis of the SNX1-SNX8 interaction as depicted in A, expressed as percentage of the SNX8-WT:SNX8-WT interaction. Intensity of fluorescent secondary antibodies was detected by an Odyssey membrane scanner and quantified in ImageJ. Values are average of 4 independent experiments, error bars indicate SEM. Asterisk indicates significant difference as tested by t-test,  $p > 0.05$ .

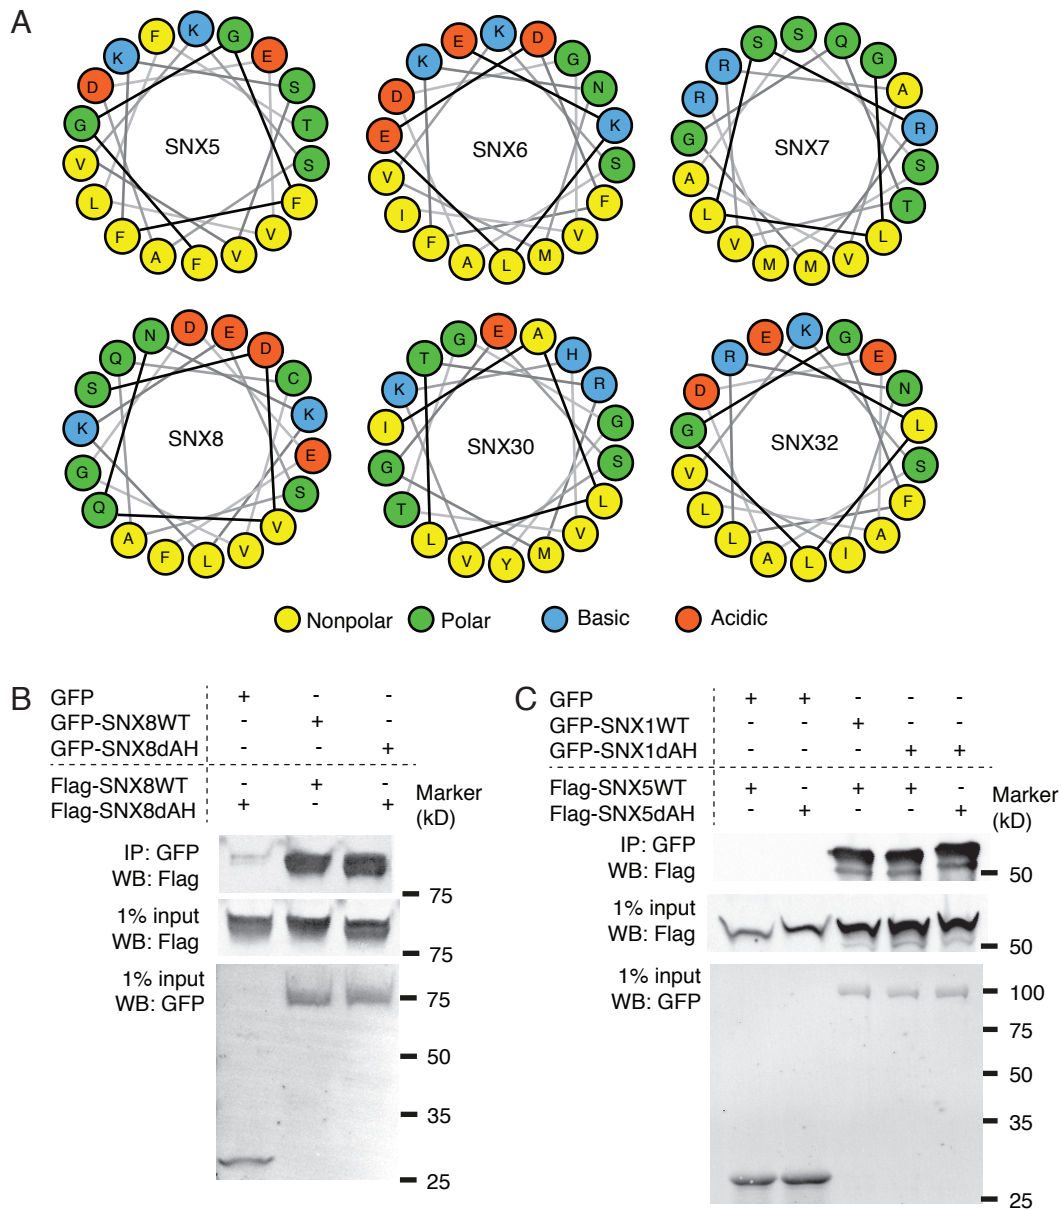

*Supplementary Figure 5: The amphipathic helices of SNX-BAR proteins.*

(A) Cartoons of the arrangement of the 18-residue AHs of SNX5, SNX6, SNX7, SNX8, SNX30 and SNX32 identified in this study (see Figure 6A).

(B) Immuno-blots of expressed wild type (WT) and amphipathic helix mutants (dAH) of Flag- and GFP-tagged SNX8 proteins in HEK-293T cells using GFP-nanotrap IP.

(C) Immuno-blots of expressed wild type (WT) and amphipathic helix mutants (dAH) of Flag- and GFP-tagged SNX1 and SNX5 in HEK-293T cells using GFP-nanotrap IP.

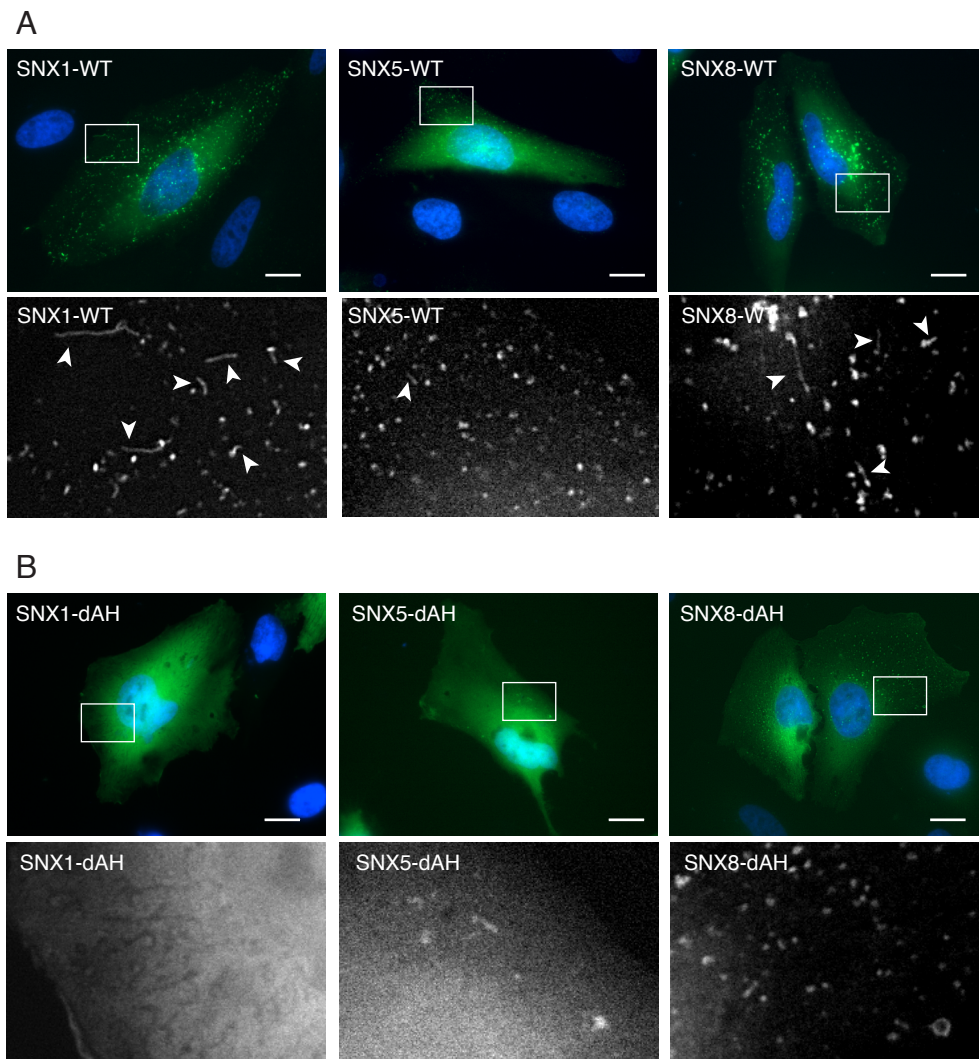

*Supplementary Figure 6: Endosomal tubulation by SNX-BAR-dAH mutant protein expression in intact mammalian cells.*

Confocal microscopy images of HeLa cells expressing (A) GFP-SNX1-WT, GFP-SNX5-WT or GFP-SNX8-WT or (B) GFP-SNX1-dAH, GFP-SNX5-dAH or GFP-SNX8-dAH in green, nucleus was stained by DAPI (blue). Colour images show the whole-cell distribution of the expressed protein, black-and-white images show the GFP-signal in the boxed area. Scale bar represents 10  $\mu$ m, GFP-labeled tubules are indicated by arrowheads.

A

```
SNX5-WT      311  RRTKALIDYENSNKALDK-----ARL--KSDVLAEAHQQ-----ECCQKFEQLS 354
SNX5-1TIP    311  RRTKALIDYQDAQATLQKKREAEARLLWANKPDLQQAKDEILEWESRVTQCCQKFEQLS 370
consensus    RRTKALIDY-----L-K-----ARL-----K--KL--A-----CCQKFEQLS
```

B

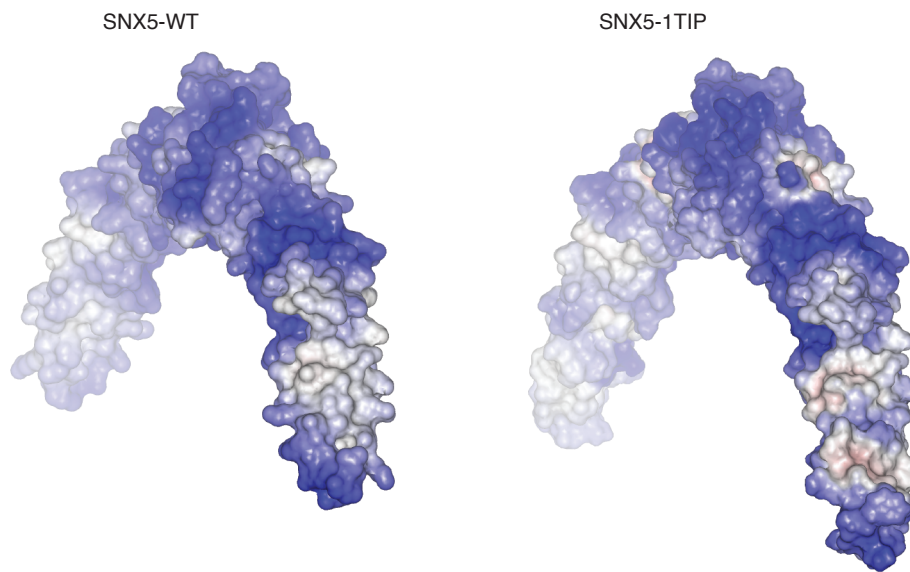

*Supplementary Figure 7: The tip-loop region of SNX1 and SNX5.*

(A) Sequence alignment of the tip-loop region of SNX5-WT and SNX5-1TIP. The highlighted lysines correspond to K442 and K445 of SNX1 present in SNX5-1TIP.

(B) Positive surface charge (blue residues) of the tip-loop region of the SNX5-WT homology model and (C) the SNX5-1TIP, including the SNX1 tip-loop region (Q421-Q462) taken from the SNX1 crystal structure.
