# Supplementary material for: Molecular basis for SNX-BAR-mediated assembly of distinct endosomal sorting tubules
Source: PubMed Central journal article supplement — EMBO J. 2012 Oct 19;31(23):4466–80. doi: 10.1038/emboj.2012.283 (PMC3512392; doi:10.1038/emboj.2012.283), 2012-10-19

**Source data figure 5C**

Boxed area indicates the cropped image shown in the figure.

anti-GFP

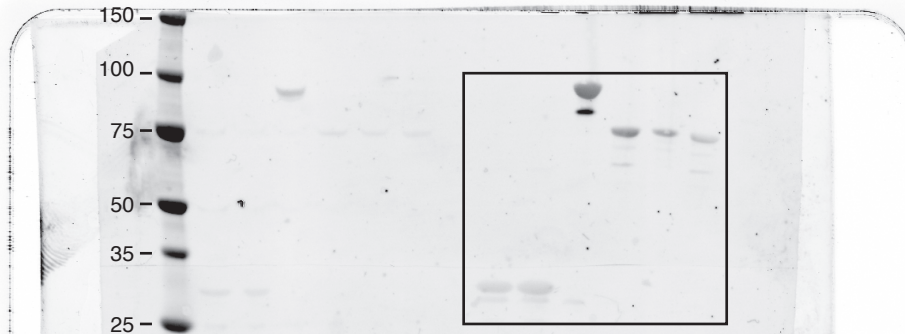

anti-FLAG: scan of the same membrane,  
ladder only visible in the 700 nm fluorescence channel (anti-GFP)

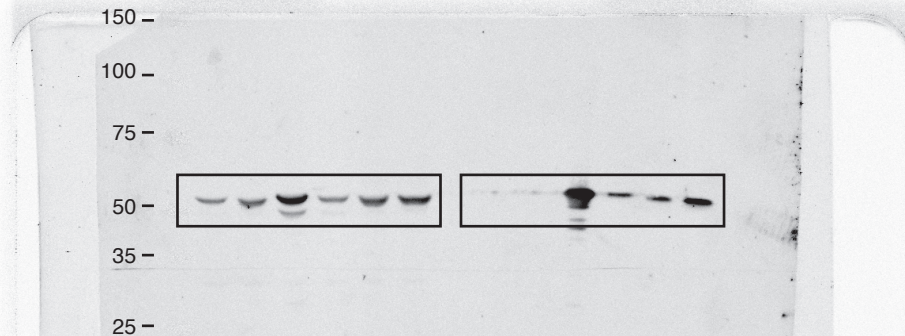

**Source data figure 5E**

Boxed area indicates the cropped image shown in the figure.

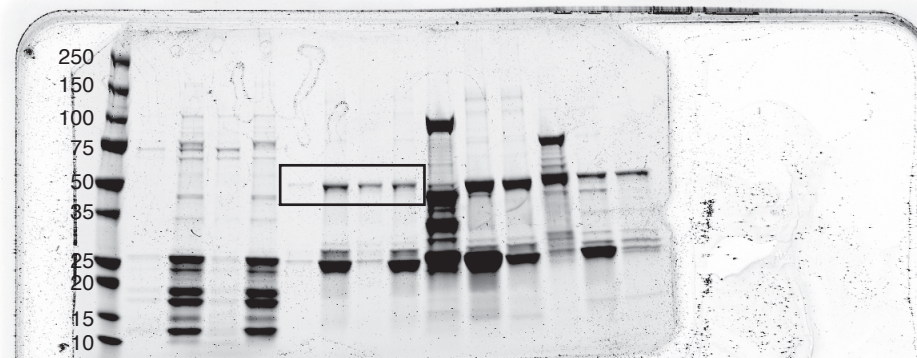

Supplement: emboj2012283s3.pdf [file emboj2012283s3.pdf]
