# Supplementary material for: Molecular basis for SNX-BAR-mediated assembly of distinct endosomal sorting tubules
Source: PubMed Central journal article supplement — EMBO J. 2012 Oct 19;31(23):4466–80. doi: 10.1038/emboj.2012.283 (PMC3512392; doi:10.1038/emboj.2012.283), 2012-10-19

**Source data figure 6E**

Boxed area indicates the cropped image shown in the figure.

**SNX1-WT**

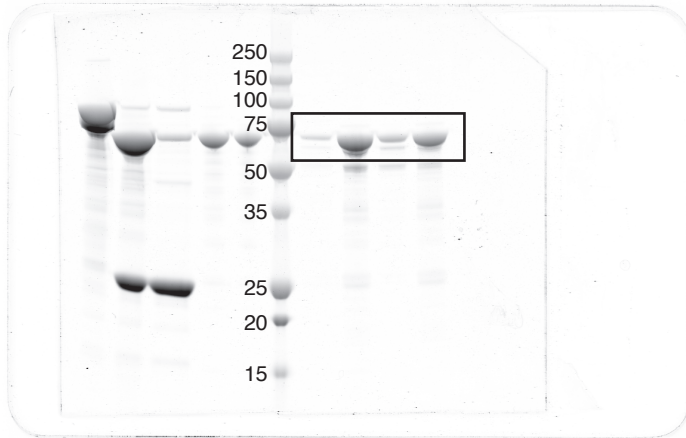

**SNX5-WT: loaded in reverse order**

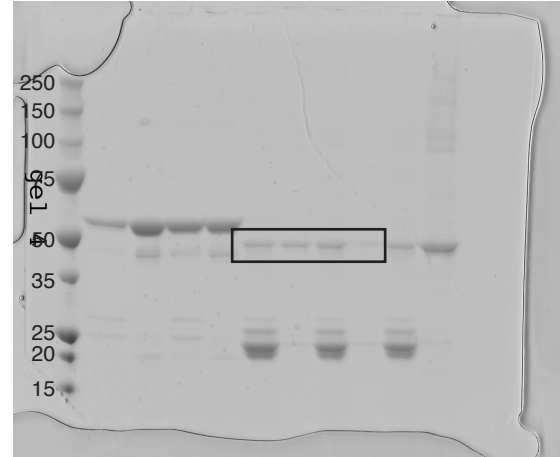

**SNX1-dAH**

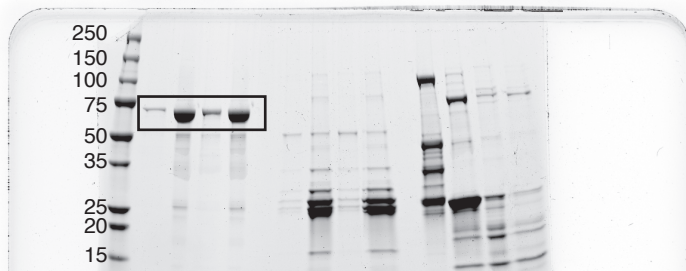

**SNX5-dAH**

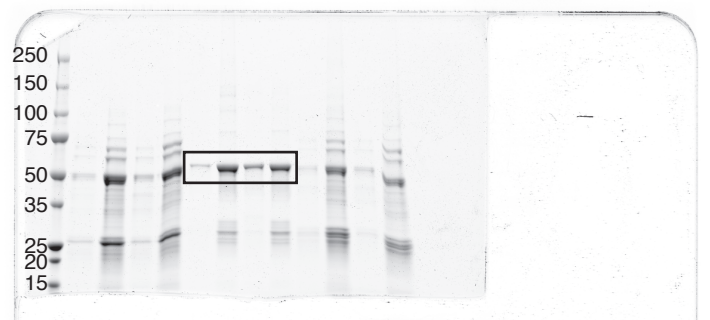

**SNX8-WT**

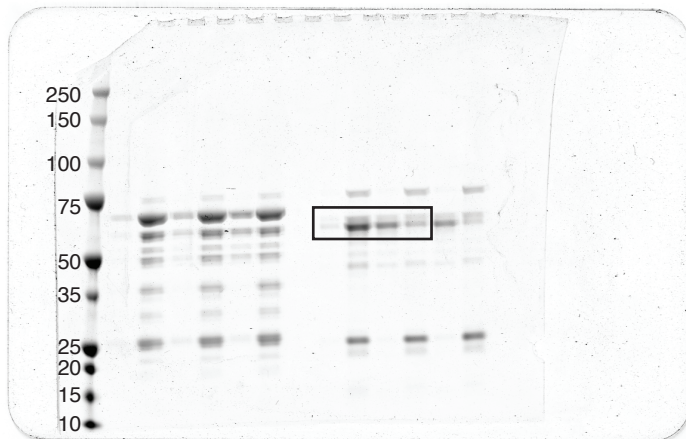

**SNX8-dAH**

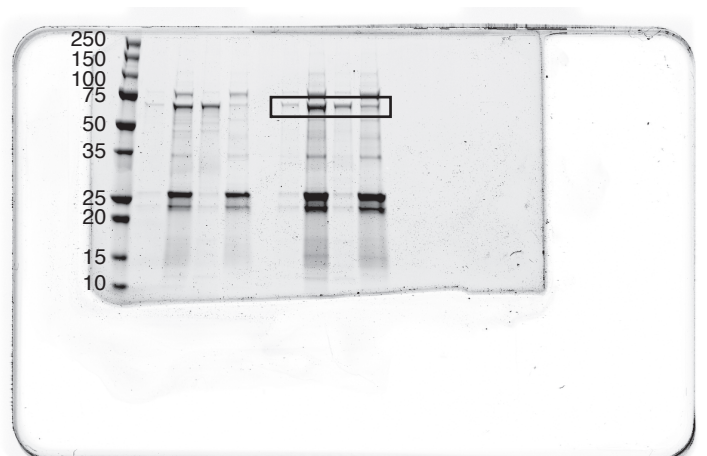

Supplement: emboj2012283s4.pdf [file emboj2012283s4.pdf]
