# Supplementary material for: Molecular basis for SNX-BAR-mediated assembly of distinct endosomal sorting tubules
Source: PubMed Central journal article supplement — EMBO J. 2012 Oct 19;31(23):4466–80. doi: 10.1038/emboj.2012.283 (PMC3512392; doi:10.1038/emboj.2012.283), 2012-10-19

**Source data figure 7D**

Boxed area indicates the cropped image shown in the figure.

SNX1-K442A

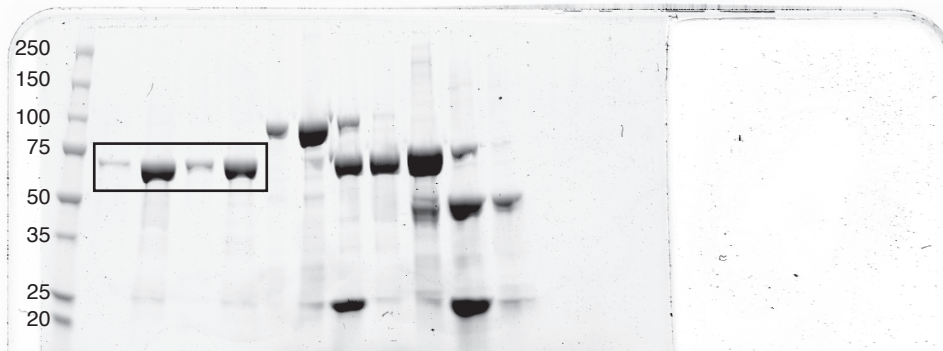

SNX1-K445A

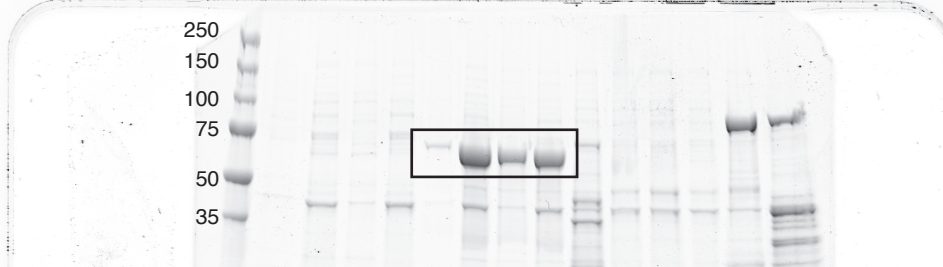

SNX1-K442/445A

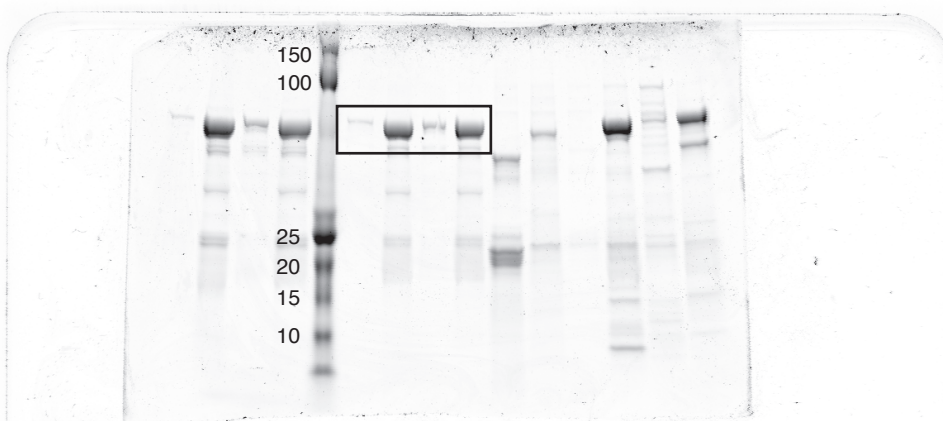

SNX5-WT-1TIP

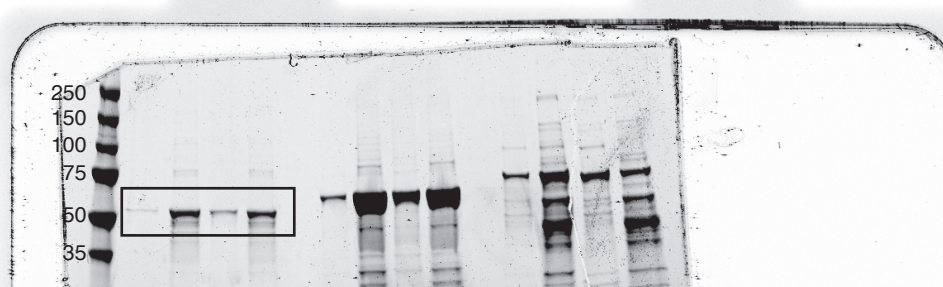

SNX5-AA-1TIP

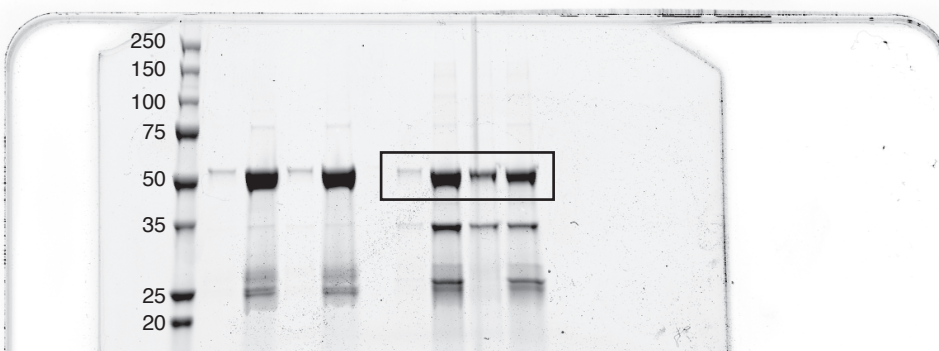

Supplement: emboj2012283s5.pdf [file emboj2012283s5.pdf]
